# Supplementary material
Source: MDPI journal article supplement (https://www.mdpi.com/2073-4344/9/6/560)
Supplement: s1 [file s1]

## Supplementary Information: Insights over titanium modified $\text{FeMgO}_x$ catalysts for selective catalytic reduction of $\text{NO}_x$ with $\text{NH}_3$ : Influence of precursors and crystalline structures

Liting Xu, Qilei Yang, Lihua Hu, Dong Wang, Yue Peng, Zheru Shao, Chunmei Lu, Junhua Li

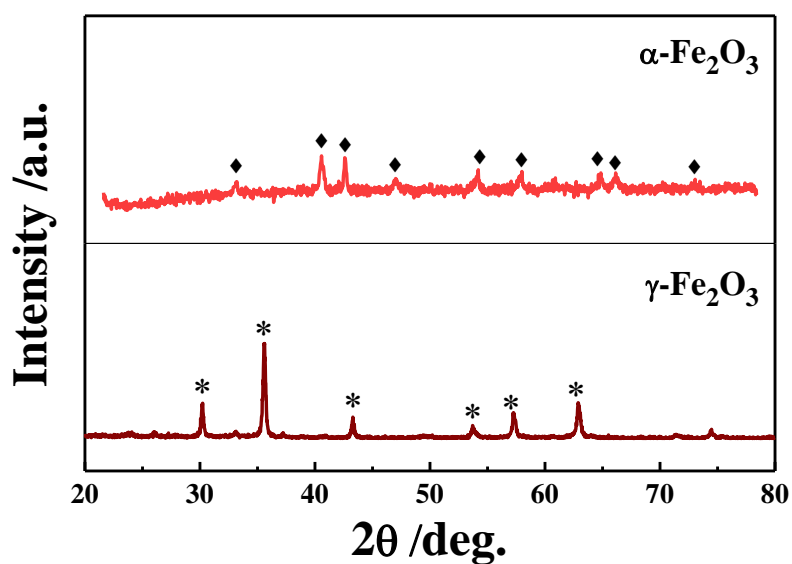

Figure S1. Powder XRD patterns of  $\text{Fe}_2\text{O}_3$ .
